# Supplementary material for: Cardiometabolic characterization in metabolic dysfunction–associated fatty liver disease
Source: PubMed Central journal article supplement (PMC9632176; doi:10.3389/fmed.2022.1023583), 2022-10-20
Supplement: Table_1.pdf [file Table_1.pdf]

**Supplementary Table 1. Cardiac function assessed through echocardiography of patients included in the study.**

|                                            | <b>Non- FLD</b> | <b>FLD</b> | <b>p value</b> |
|--------------------------------------------|-----------------|------------|----------------|
| <b>n</b>                                   | 34              | 35         | -              |
| <b>Systolic dysfunction; n (%)</b>         | 0 (0)           | 0 (0)      | -              |
| <b>LVEF (%)</b>                            | 62±6            | 65±6       | 0.126          |
| <b>Left ventricular hypertrophy; n (%)</b> | 11 (32.4)       | 24 (68.6)  | 0.003          |
| <b>Dyastolic dysfunction; n (%)</b>        | 22 (64.7)       | 30 (85.7)  | 0.043          |

Values are expressed as mean (SD), unless otherwise stated.

FLD, fatty liver disease; LVEF, left ventricular ejection fraction.

**Supplementary Table 2. Adjusted means of metabolic phenotypes of fatty liver disease with visceral adipose tissue and visceral adipose tissue/subcutaneous adipose tissue ratio.**

| <b>Metabolic Phenotypes</b> | <b>VAT</b>                    | <b>VAT/SCAT ratio</b>         |
|-----------------------------|-------------------------------|-------------------------------|
|                             | <b>Adjusted mean (95% CI)</b> | <b>Adjusted mean (95% CI)</b> |
| <b>Non-FLD nor MD</b>       | 2594.39 (2278.45 to 2910.32)  | 0.67 (0.61 to 0.72)           |
| <b>Non-FLD with MD</b>      | 3899.71 (3528.24 to 4271.17)  | 0.68 (0.61 to 0.75)           |
| <b>Non-MD FLD</b>           | 2264.19 (1689.97 to 2838.40)  | 0.63 (0.52 to 0.74)           |
| <b>MAFLD-MHO</b>            | 3752.19 (3439.47 to 4064.90)  | 0.75 (0.69 to 0.81)           |
| <b>MAFLD-MUHO</b>           | 4931.09 (4556.12 to 5306.05)  | 0.79 (0.72 to 0.86)           |
| <b>MAFLD-T2D</b>            | 4858.80 (4324.18 to 5393.41)  | 0.96 (0.86 to 1.06)           |

95% CI, 95% confidence interval; FLD, fatty liver disease; MAFLD, metabolic dysfunction–associated fatty liver disease; MD, metabolic dysfunction; MHO, metabolically healthy obesity; MUHO, metabolically unhealthy obesity; T2D, type 2 diabetes; VAT, visceral adipose tissue; VAT/SCAT ratio, visceral adipose tissue/subcutaneous adipose tissue ratio.

**Supplementary Table 3. Associations between metabolic phenotypes of fatty liver disease and high indexed epicardial adipose tissue (>68.1 mL).**

| <b>Metabolic Phenotypes</b> | <b>High indexed epicardial adipose tissue (&gt;68.1)</b> |                |
|-----------------------------|----------------------------------------------------------|----------------|
|                             | <b>OR (95% CI)</b>                                       | <b>P value</b> |
| <b>Non-FLD nor MD</b>       | Reference                                                | Reference      |
| <b>Non-MD FLD</b>           | 1.77 (0.67 to 4.73)                                      | 0.251          |
| <b>MAFLD-MHO</b>            | 3.62 (1.83 to 7.16)                                      | <0.001         |
| <b>MAFLD-MUHO</b>           | 17.60 (6.71 to 46.20)                                    | <0.001         |
| <b>MAFLD-T2D</b>            | 15.87 (4.26 to 59.12)                                    | <0.001         |

95% CI, 95% confidence interval; FLD, fatty liver disease; MAFLD, metabolic dysfunction–associated fatty liver disease; MD, metabolic dysfunction; MHO, metabolically healthy obesity; MUHO, metabolically unhealthy obesity; OR, odds ratio; T2D, type 2 diabetes.

**Supplementary Table 4. Associations between metabolic phenotypes of fatty liver disease and moderate to severe coronary artery calcification (Agatston CAC score>100).**

| Metabolic Phenotypes  | Moderate to severe coronary artery calcification (Agatston CAC score>100) |           |
|-----------------------|---------------------------------------------------------------------------|-----------|
|                       | OR (95% CI)                                                               | p value   |
| <b>Non-FLD nor MD</b> | Reference                                                                 | Reference |
| <b>Non-MD FLD</b>     | 2.11 (0.46 to 9.74)                                                       | 0.341     |
| <b>MAFLD-MHO</b>      | 1.84 (0.67 to 5.00)                                                       | 0.235     |
| <b>MAFLD-MUHO</b>     | 2.54 (0.90 to 7.13)                                                       | 0.077     |
| <b>MAFLD-T2D</b>      | 6.56 (2.18 to 19.76)                                                      | 0.001     |

95% CI, 95% confidence interval; FLD, fatty liver disease; MAFLD, metabolic dysfunction-associated fatty liver disease; MD, metabolic dysfunction; MHO, metabolically healthy obesity; MUHO, metabolically unhealthy obesity; OR, odds ratio; T2D, type 2 diabetes.
